RETRACTION

# Retraction: Adoption of image surface parameters under moving edge computing in the construction of mountain fire warning method

The *PLOS One* Editors

The *PLOS One* Editors retract this article [1] because it was identified as one of a series of submissions for which we have concerns about peer review integrity and potential manipulation of the publication process. These concerns call into question the validity and provenance of the reported results. We regret that the issues were not identified prior to the article's publication.

All authors either did not respond directly or could not be reached.

## Reference

1. Cheng C, Zhou H, Chai X, Li Y, Wang D, Ji Y, et al. Adoption of image surface parameters under moving edge computing in the construction of mountain fire warning method. PLoS One. 2020;15(5):e0232433. <https://doi.org/10.1371/journal.pone.0232433> PMID: [32459811](https://pubmed.ncbi.nlm.nih.gov/32459811/)

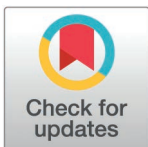

## OPEN ACCESS

**Citation:** The *PLOS One* Editors (2025) Retraction: Adoption of image surface parameters under moving edge computing in the construction of mountain fire warning method. PLoS ONE 20(3): e0319599. <https://doi.org/10.1371/journal.pone.0319599>

**Published:** March 5, 2025

**Copyright:** © 2025 The *PLOS One* Editors. This is an open access article distributed under the terms of the [Creative Commons Attribution License](https://creativecommons.org/licenses/by/4.0/), which permits unrestricted use, distribution, and reproduction in any medium, provided the original author and source are credited.
